# Supplementary material for: Unusual Product Distribution from Friedländer Reaction of Di- and Triacetylbenzenes with 3-Aminonaphthalene-2-carbaldehyde and Properties of New Benzo[g]quinoline-Derived Aza-aromatics
Source: MDPI journal article supplement (doi:10.3390/molecules190812842), 2014-08-21

# Supplementary Materials

Figure S1.  $^1\text{H-NMR}$  of **3ab**.

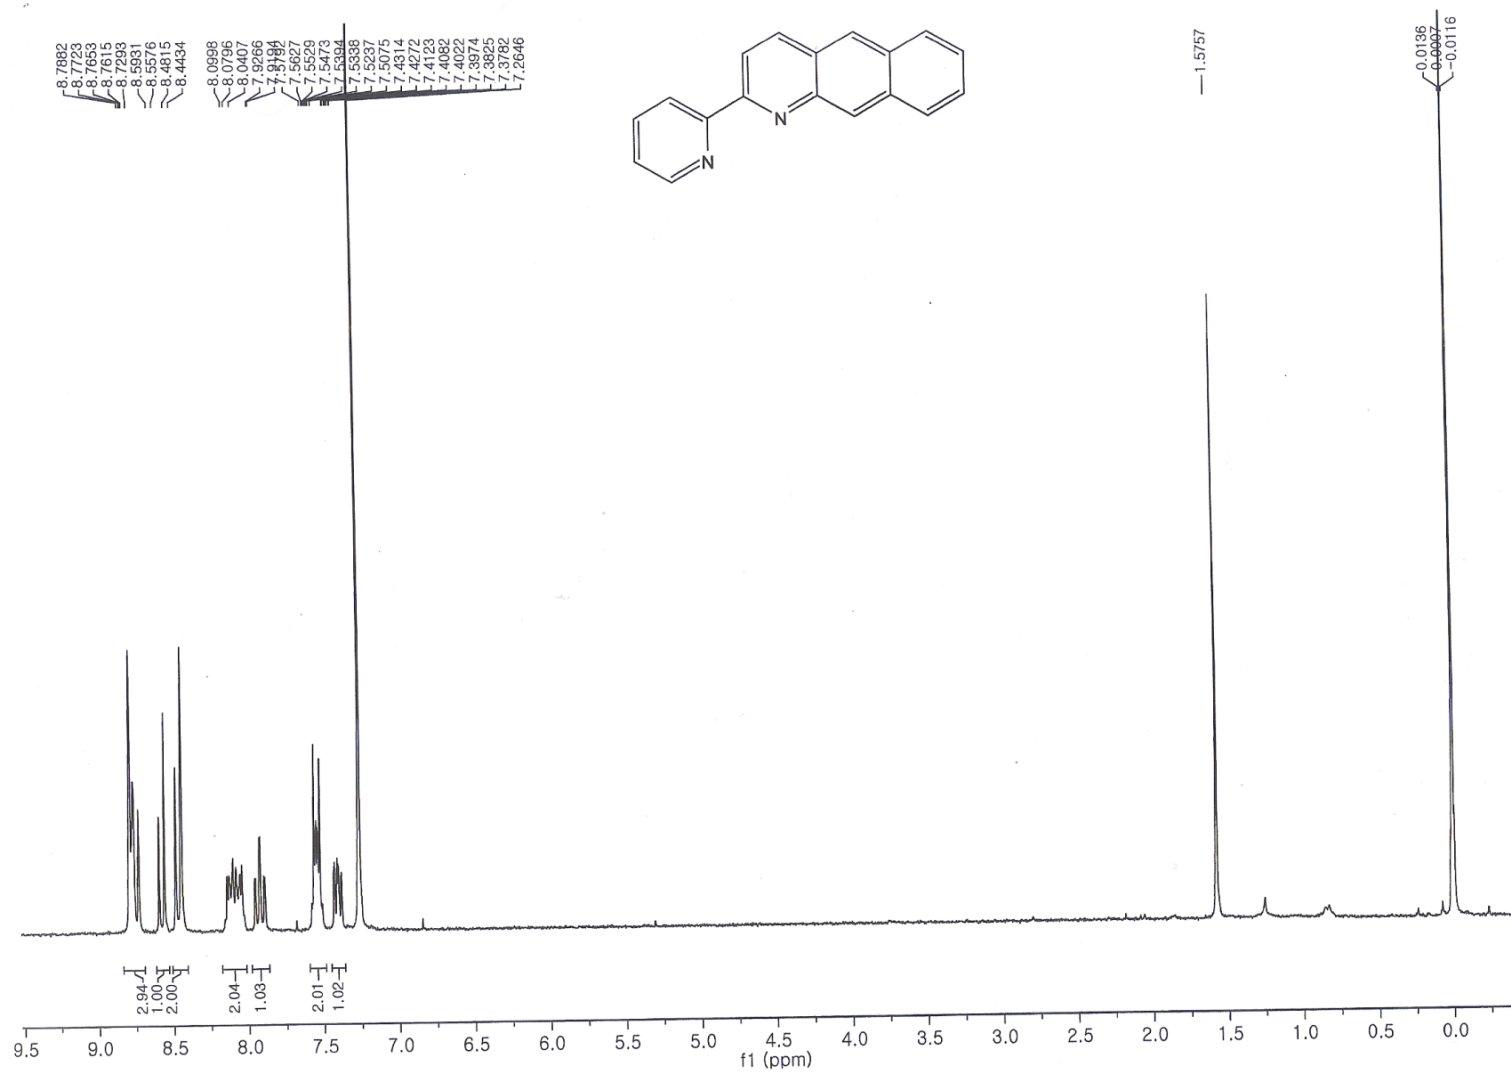

Figure S2.  $^{13}\text{C}$ -NMR of 3ab.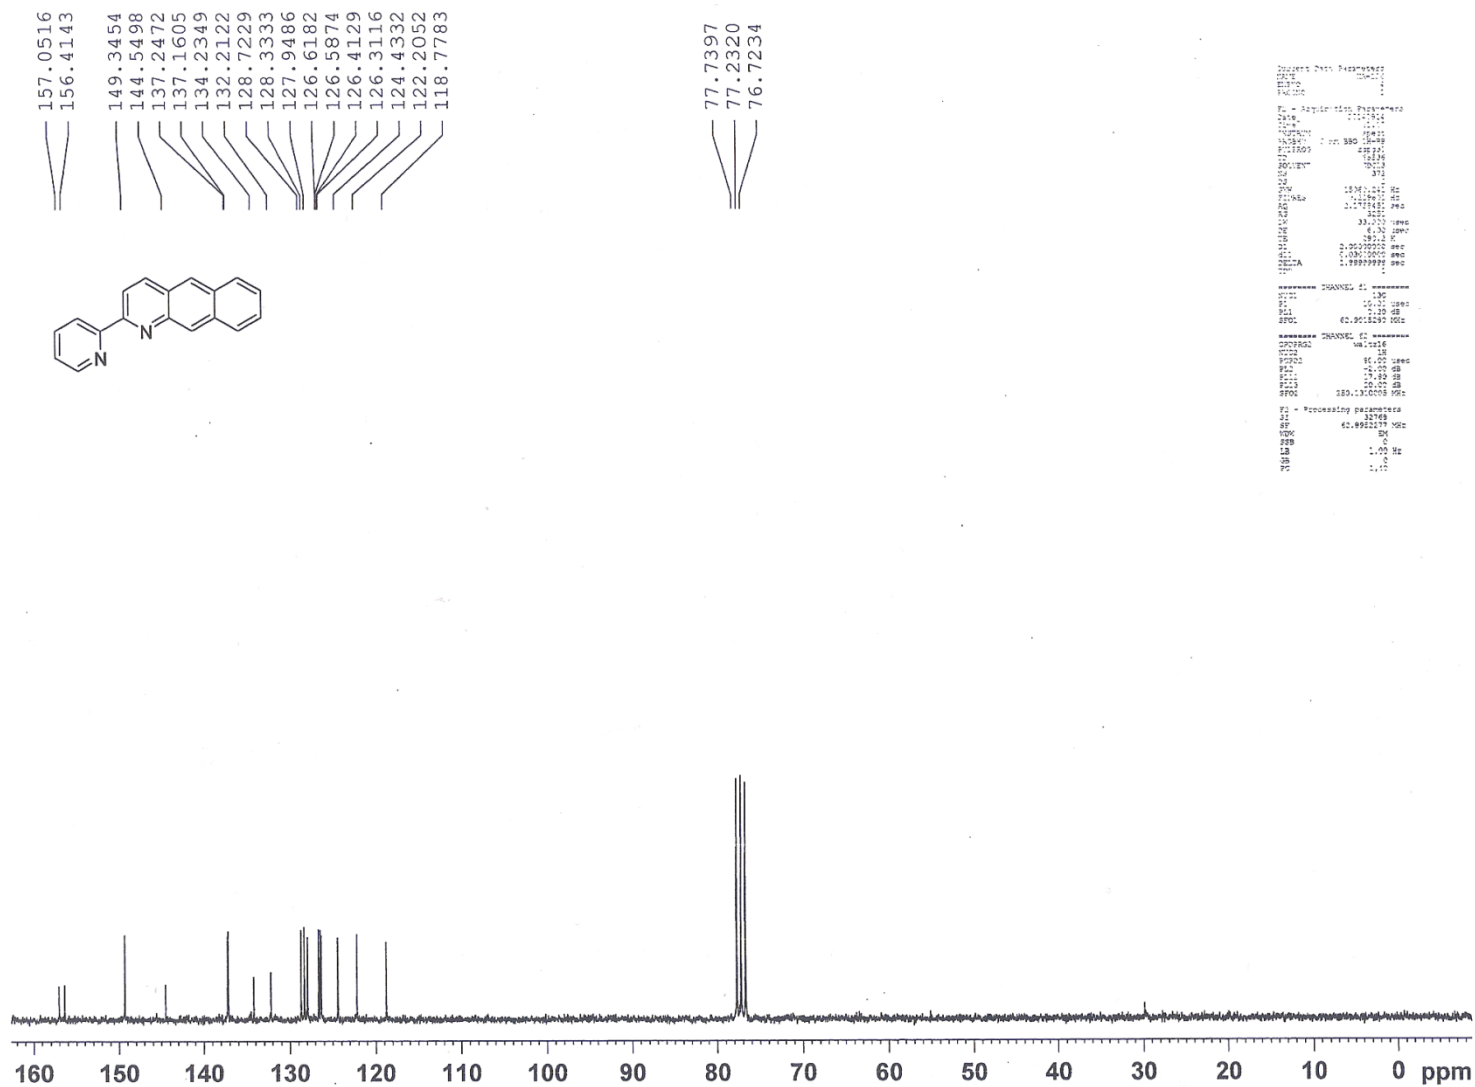

Figure S3.  $^1\text{H-NMR}$  of 3c.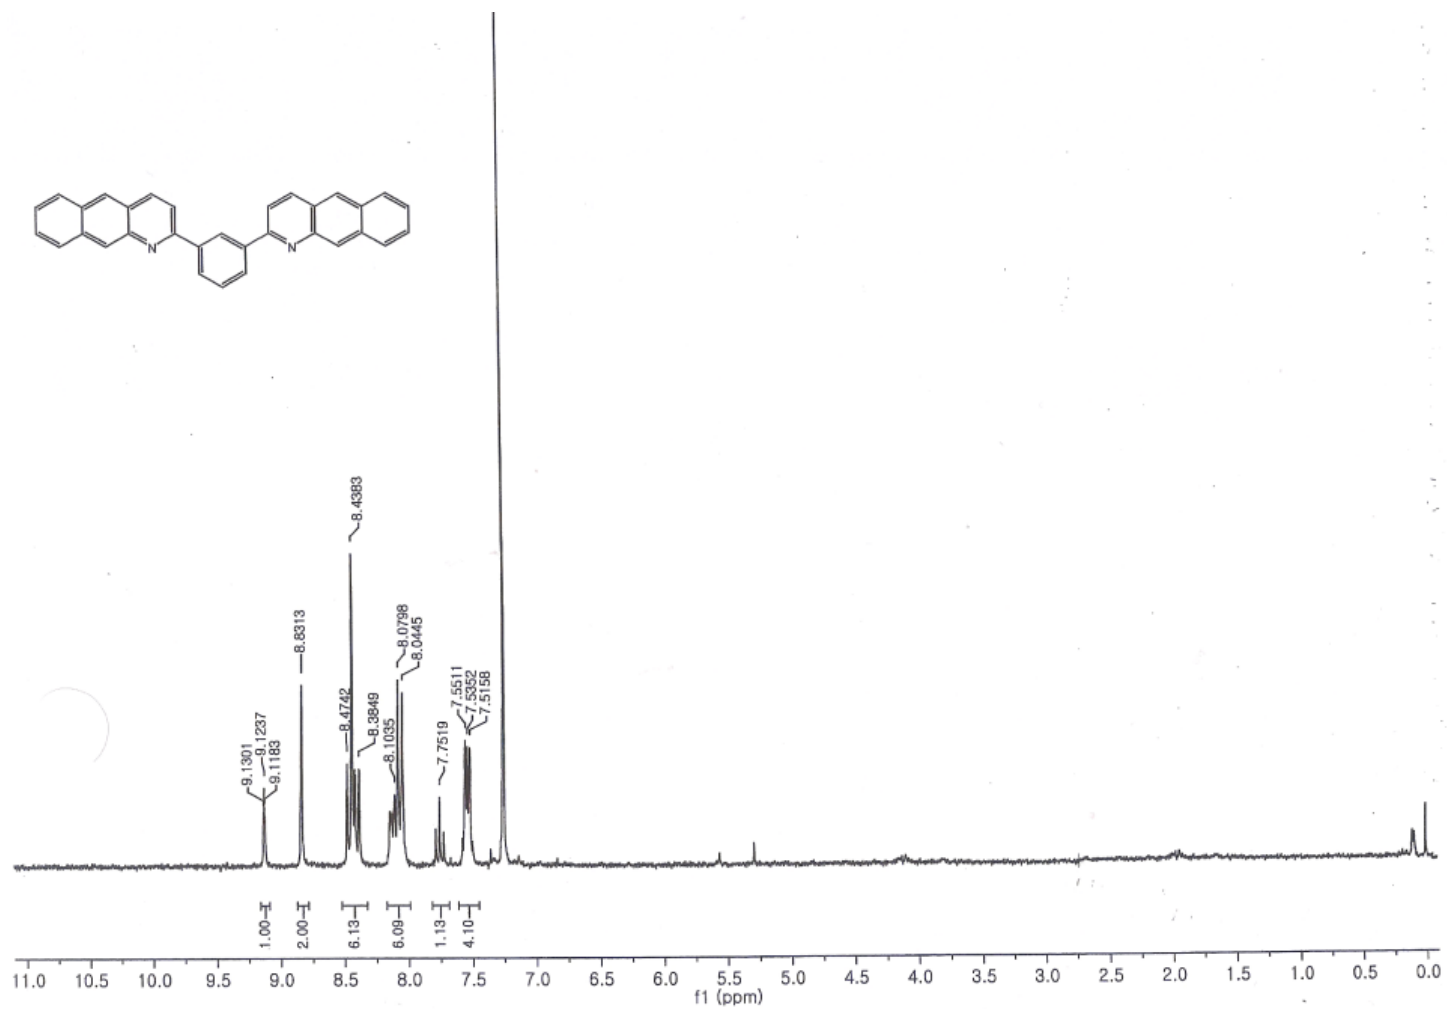

Figure S4.  $^{13}\text{C}$ -NMR of 3c.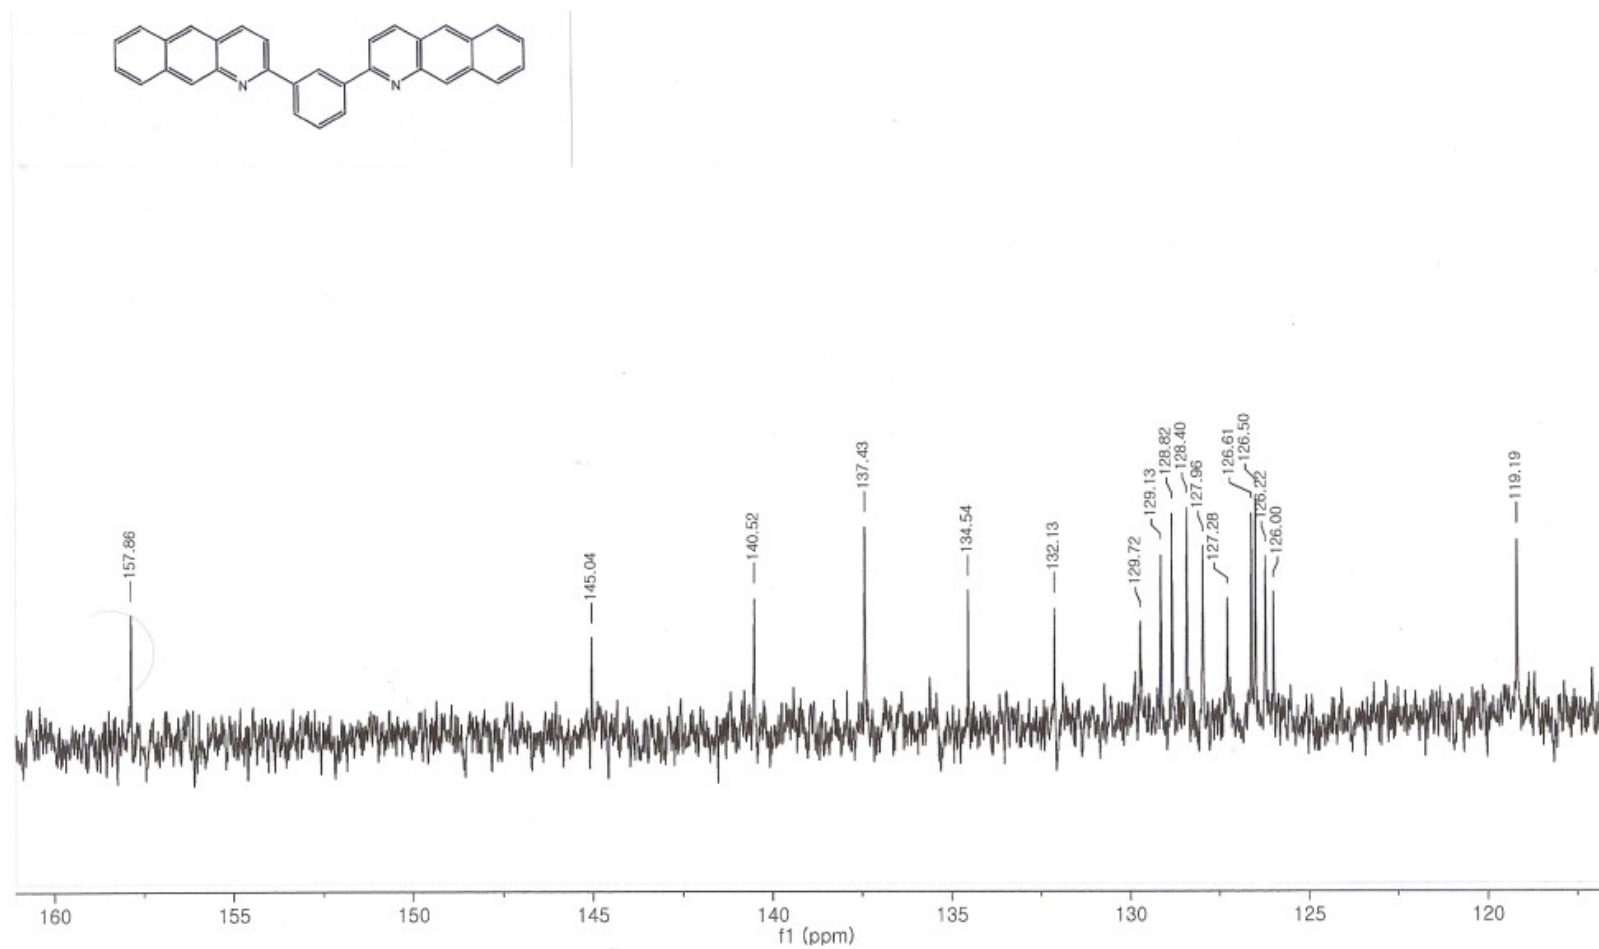

Figure S5.  $^1\text{H-NMR}$  of 3e.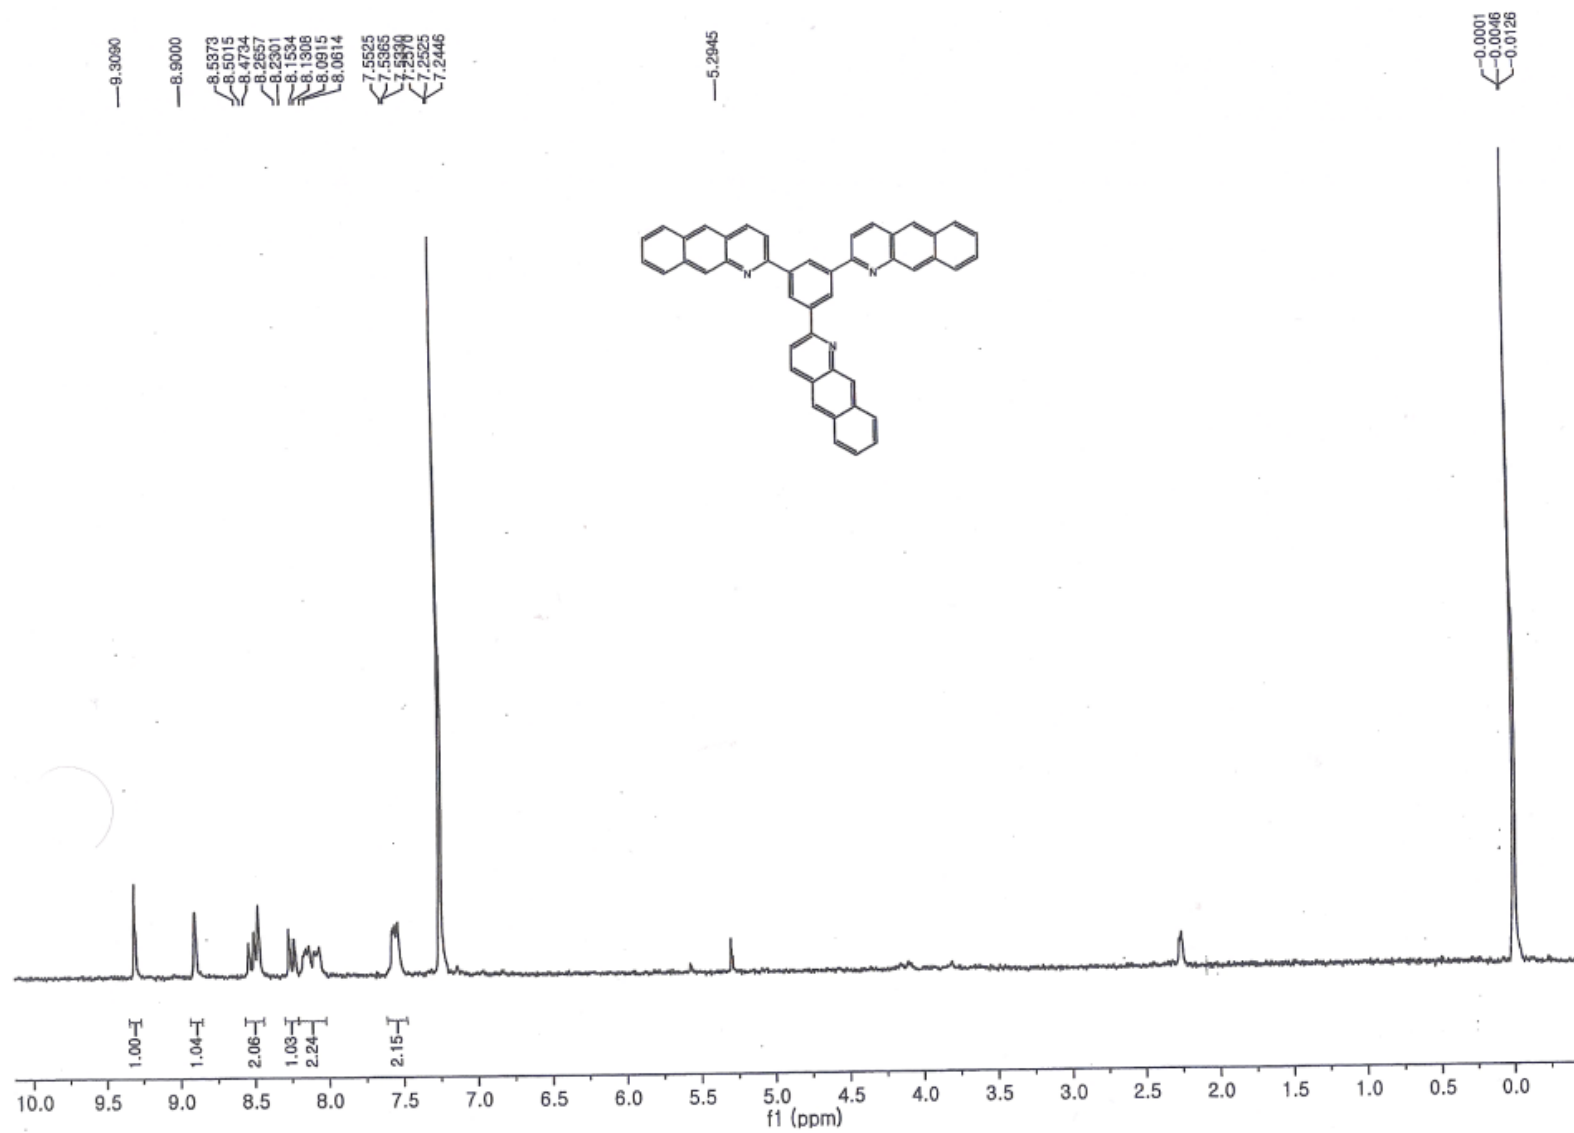

Figure S6.  $^1\text{H-NMR}$  of 4.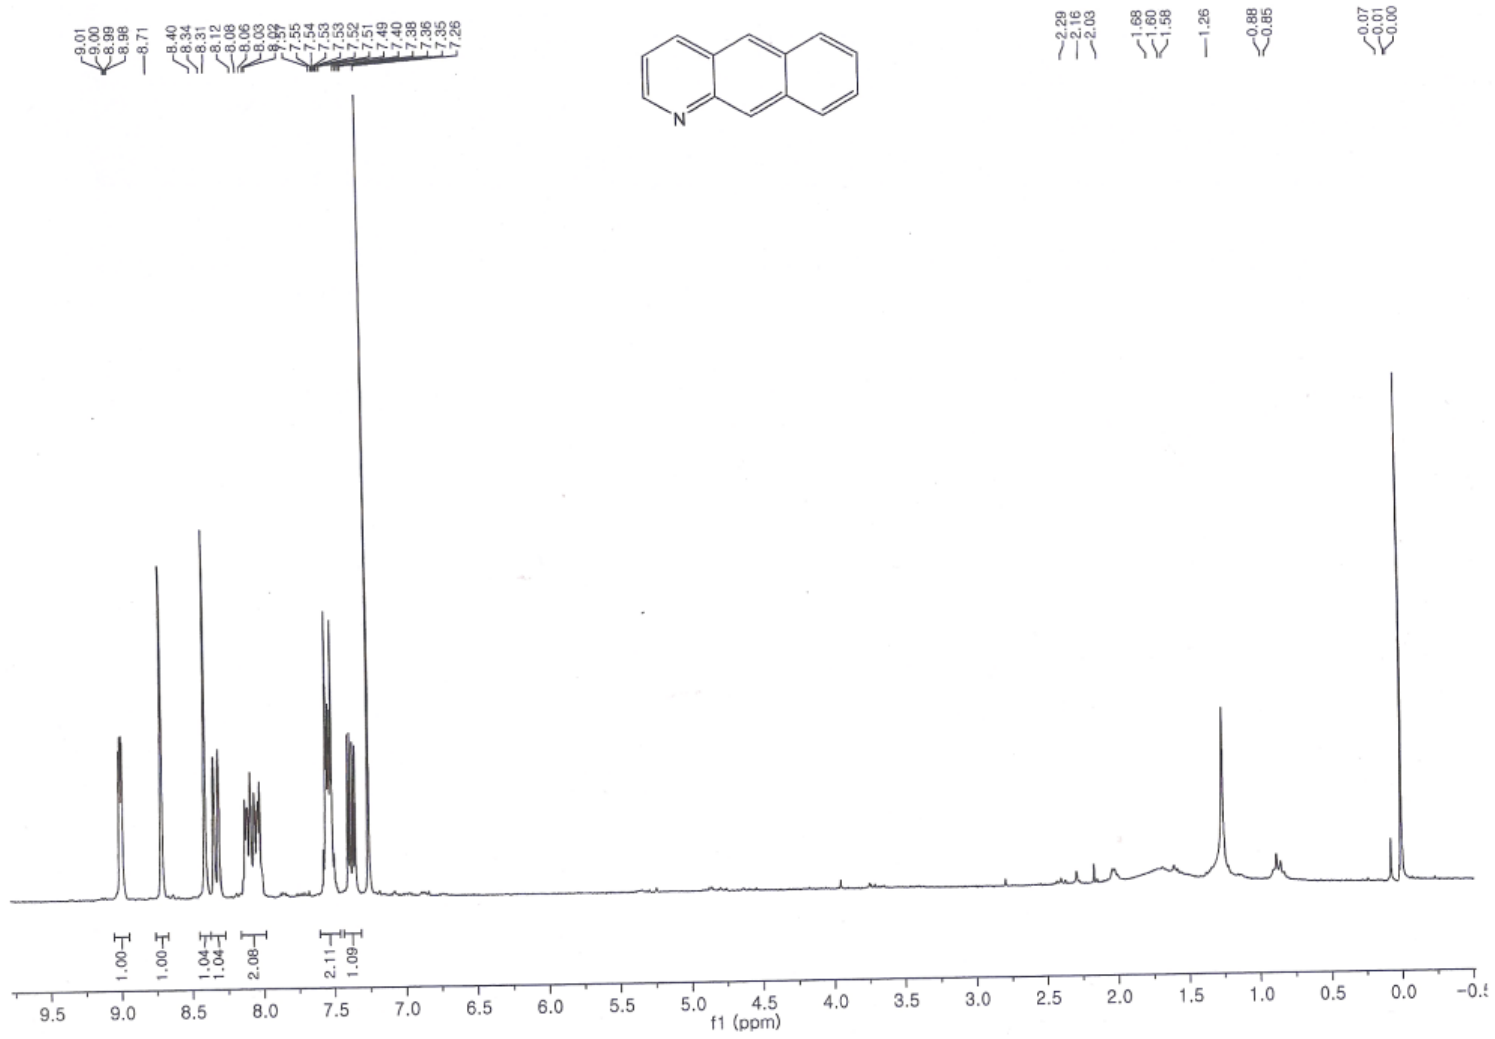

Supplement: s1 [file s1]
